# Supplementary material
Source: Springer Nature journal article supplement (https://www.springermedizin.de/resource/supplementary/13041_2011_124_MOESM2_ESM.pdf/25657566)

**5-HT1A  
Autoreceptors**

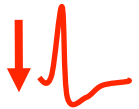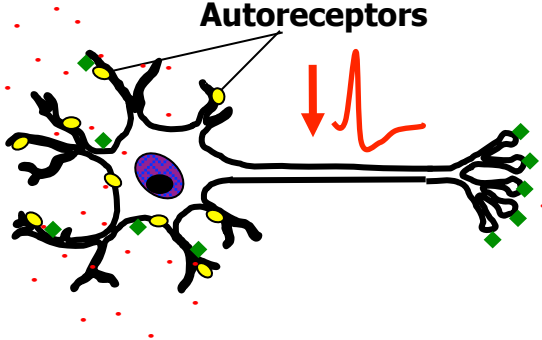

**5-HT NEURON**

**Postsynaptic  
5-HT1A Receptors**

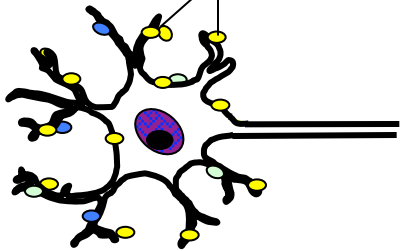

**POSTSYNAPTIC  
NEURON**

Supplement: MOESM2 [file 25657566]
